# 1 Selection of long COVID symptoms influences prevalence 2 estimates in a prospective cohort

3

## 4 Authors:

5 Elke Wynberg (MBBS, MSc)<sup>1</sup>, Godelieve J. de Bree (MD, PhD)<sup>2</sup>, Tjalling Leenstra (MD,  
6 PhD)<sup>3</sup>, Anouk Verveen (MSc)<sup>4</sup>, Hugo D.G. van Willigen (MD)<sup>5</sup>, Menno D. de Jong (MD,  
7 PhD)<sup>5</sup>, Maria Prins (PhD)<sup>1,5\*</sup>, and Anders Boyd (PhD)<sup>1,6\*</sup> for the RECoVERED Study Group†

## 8 Author Affiliations:

9 <sup>1</sup> Department of Infectious Diseases, Public Health Service of Amsterdam, Amsterdam, the  
10 Netherlands

11 <sup>2</sup> Department of Infectious Diseases, Amsterdam UMC, University of Amsterdam,  
12 Amsterdam Institute for Infection and Immunity, Amsterdam, the Netherlands

13 <sup>3</sup> National Institute for Public Health and the Environment (RIVM), Center for Infectious  
14 Disease Control (LCI), Bilthoven, Netherlands

15 <sup>4</sup> Department of Medical Psychology, Amsterdam UMC, Amsterdam Public Health Research  
16 Institute, University of Amsterdam, Amsterdam, the Netherlands

17 <sup>5</sup> Department of Medical Microbiology & Infection Prevention, Amsterdam UMC, University of  
18 Amsterdam, Amsterdam Institute for Infection and Immunity, Amsterdam, the Netherlands

19 <sup>6</sup> Stichting hiv monitoring, Amsterdam, the Netherlands

## 20 Corresponding author:

21 Name: Elke Wynberg

22 Address: Department of Infectious Diseases, Public Health Department of Amsterdam,  
23 Nieuwe Achtergracht 100, 1018 WT, Amsterdam, the Netherlands

24 Email: ewijnberg@ggd.amsterdam.nl

25 Telephone: +31 627991940

26 ORCID: 0000-0002-8245-086X

27

28 † Listed in Acknowledgments \*Authors contributed equally

29 Key words: Long COVID, COVID-19, symptoms

30 Running title: Variations of long COVID symptom selection

31 **Abstract**

32 **Background:**

33 Studies on long COVID differ in the selection of symptoms used to define the condition. We  
34 aimed to assess to what extent symptom selection impacts prevalence estimates of long  
35 COVID.

36 **Methods:**

37 In a prospective cohort of patients who experienced mild to critical coronavirus disease 2019  
38 (COVID-19), we used longitudinal data on the presence of 20 different symptoms to evaluate  
39 changes in the prevalence of long COVID over time when altering symptom selection.

40 **Results:**

41 Changing symptom selection resulted in wide variation in long COVID prevalence, even  
42 within the same study population. Long COVID prevalence at 12 months since illness onset  
43 ranged from 39.6% (95%CI=33.4-46.2) when using a limited selection of symptoms to 80.6%  
44 (95%CI=74.8-85.4) when considering any reported symptom to be relevant.

45 **Conclusions:**

46 Comparing the occurrence of long COVID is already complex due to heterogeneity in study  
47 design and population. Disparate symptom selection may further hamper comparison of long  
48 COVID estimates between populations. Harmonised data collection tools could be one  
49 means to achieve greater reproducibility and comparability of results.

## 50 Introduction

51 Commonly-used definitions of long COVID, or post-acute sequelae of COVID-19 (PASC),  
52 require the presence of at least one relevant symptom for a minimum period of time [1, 2].  
53 Although most definitions stipulate that long COVID symptoms must not be linked to an  
54 alternative diagnosis, the decision as to which complaints are considered relevant is left to  
55 the discretion of researchers and clinicians. Notwithstanding existing heterogeneity in study  
56 population and design, inconsistencies in symptom selection between studies may further  
57 influence the ability to compare long COVID prevalence estimates.

58 These inconsistencies in symptom selection may arise from numerous methodological  
59 differences. Some studies, for instance, choose to adopt a brief questionnaire to collect data  
60 on a limited number of symptoms[3]. Other studies record the presence of over 50 distinct  
61 symptoms to encompass the full spectrum of the long COVID phenotype[4], unsurprisingly  
62 reporting higher prevalence rates of long COVID than studies using less exhaustive symptom  
63 surveys. Long COVID is also known to exhibit patterns of remitting and relapsing  
64 symptoms[4]. However, correctly attributing recurrent episodes of non-specific symptoms to  
65 long COVID remains a methodological challenge. Indeed, researchers may differ in their  
66 choice to record prevalent (i.e., at a given moment) or persistent symptoms (i.e., those that  
67 are found for two or more consecutive visits and/or from illness onset onwards) in their  
68 definition of long COVID.

69 No studies to date have evaluated the extent to which these methodological differences can  
70 affect prevalence estimates of long COVID. In this study, we aimed to assess how symptom  
71 selection could impact prevalence rates of long COVID within a prospective cohort.

## 72 Methods

73 RECoVERED is a prospective cohort of adults who experienced mild to critical COVID-19 [5].  
74 Methodology has been described in more detail elsewhere[5]. Briefly, study participants were  
75 enrolled within 7 days of COVID-19 diagnosis (for community-dwelling participants) or  
76 admission to hospital (for hospitalised participants). A small number of hospitalised  
77 participants were enrolled retrospectively up to 3 months after illness onset in May and June  
78 2020, to capture patients admitted to hospital during the first wave of COVID-19 in the  
79 Netherlands. All participants had laboratory confirmation of SARS-CoV-2 infection by reverse  
80 transcriptase polymerase chain reaction (RT-PCR). Individuals residing in a nursing home  
81 and those with mental disorders deemed likely to interfere to adherence to study procedures  
82 were excluded. Study participants were interviewed by trained study staff on the presence  
83 and duration of 20 symptoms, socio-demographic details, and past medical history during the  
84 first month of follow-up. On months 2 to 12 of follow-up, participants completed monthly  
85 online surveys on the presence (in the past month) of these same symptoms; these  
86 questionnaires were repeated at month 18 and 24 of follow-up.

87 To demonstrate the effect of changing symptom-based definitions of long COVID, we  
88 examined the proportion of individuals from month 3 since illness onset onwards who  
89 reported at least 1 symptom among (1) any of the 20 recorded symptoms, (2) only symptoms  
90 occurring within one month of COVID-19 onset, thus assumed to be attributable to COVID-  
91 19, (3) the four most commonly-reported long COVID symptoms (i.e., fatigue, dyspnoea, loss  
92 of smell/taste, myalgia), and (4) the four long COVID symptoms that continued to be present  
93 in at least 2 consecutive surveys (i.e., persistent symptoms). Corresponding 95% confidence  
94 intervals (CIs) for each time-point were estimated according to the method for binomial  
95 proportions[6].

96 RECoVERED was approved by the medical ethical review board of the Amsterdam  
97 University Medical Centres (NL73759.018.20). For the current analysis, we used follow-up  
98 data collected up to 1 June 2022.

99 **Results**

100 Between 11 May 2020 and 21 June 2021, 349 participants were enrolled in RECoVERED, of  
101 whom none were vaccinated for COVID-19 at enrolment. Of these participants, 292  
102 ( $n=83.7\%$ ) completed at least 1 symptom survey. Those who did not complete any symptom  
103 survey ( $n=57/349$  [16.3%]) were excluded from the current analysis; they did not differ  
104 significantly in age, sex, BMI or COVID-19 severity from those who completed at least one  
105 survey. Over half of included participants were male ( $n=170/292$ , 58%) and the median age  
106 was 51 years (interquartile range, IQR=36-62) (Table 1). Participants were followed for a  
107 median of 562 days (IQR=399-689). However, median follow-up time was slightly shorter  
108 among those who had had severe/critical disease (449 days, IQR=274-698) compared to  
109 those with mild (561 days, IQR=412-658) and moderate (587 days, IQR=442-701) disease  
110 ( $p=0.02$ ).

111 Across all time-points, prevalence estimates were higher when adopting a more inclusive  
112 selection of long COVID symptoms (Figure 1). The proportion of participants with long  
113 COVID at month 3 since illness onset varied widely, from 56.0% (95%CI=48.9-62.9) when  
114 restricting to persistent key long COVID symptoms to 81.2% (95%CI=74.9-86.2) when  
115 counting any of the 20 recorded symptoms. The difference between proportions was even  
116 greater at month 12, ranging from 39.6% (95%CI=33.4-46.2) to 80.6% (95%CI=74.8-85.4).

117 When stratifying by acute COVID-19 severity, prevalence estimates of long COVID differed  
118 most when defining long COVID according to persistent key long COVID symptoms  
119 (Supplementary Figure S1). At 18 months after illness onset, the prevalence of long COVID  
120 was 39.0% (95%CI=25.4-54.6) among those with severe/critical disease, 29.8 (95%CI=21.0-  
121 40.4) among those with moderate disease, and 21.5% (13.1-33.1) among participants with  
122 mild COVID-19, defined according to persistent key long COVID symptoms.

## 123 Discussion

124 Long COVID studies to date have differed in the number and type of symptoms considered  
125 relevant. Selection of symptoms based on presumed underlying pathophysiology or  
126 persistence over time remains a subjective process, making generalisability across studies  
127 extremely challenging. We found that, even within the same cohort, the estimated prevalence  
128 of long COVID at 12 months could differ by almost 60% according to the level of stringency  
129 used to select symptoms. As expected, more restrictive methods resulted in a lower  
130 proportion of participants being identified as having at least one symptom. We also observed  
131 a lower prevalence when only participants with longitudinally persistent symptoms were  
132 considered to have long COVID, thus excluding more fleeting symptom episodes. This is  
133 likely to represent partly between-month relapsing-remitting pattern of symptoms in some  
134 long COVID patients, and demonstrate that cross-sectional estimates may be biased towards  
135 higher prevalence due to including the transient presence of non-specific symptoms.

136 Our observations have important downstream consequences for prevention and intervention.  
137 Firstly, particular symptoms may be correlated with specific risk factors. As a consequence,  
138 symptom selection could affect a study's ability to identify these determinants. Moreover,  
139 variation in symptom selection may have consequences for outcome measurement in clinical  
140 trials for novel treatments for long COVID. If recovery is defined by the resolution of a  
141 restricted list of symptoms, and this list varies between clinical trials, the probability of  
142 achieving the outcome of interest may vary widely between studies. Indeed, disparities in  
143 symptom selection when defining long COVID directly impacts the definition of what we  
144 mean by recovery, adding further methodological complexity. Finally, wide variation in  
145 estimating the prevalence of long COVID may introduce confusion among the general public  
146 about the condition, and reinforce mistrust by parties who are sceptical about the  
147 physiological nature of the condition[7]. These implications may, in turn, amplify stigma  
148 towards individuals with long COVID, hinder access to care, and diminish investment in  
149 further research.

150 Our study's strengths are the long follow-up time, prospective design, representation of the  
151 full spectrum of COVID-19 disease severity, and comprehensive longitudinal symptom data.  
152 This analysis also presents a novel perspective on the underlying methodology of a rapidly-  
153 growing evidence base on long COVID. However, our study also has limitations. Differential  
154 loss-to-follow-up according to COVID-19 severity may have exerted a downward bias on  
155 later prevalence estimates, with participants with severe/critical disease having a relatively  
156 shorter follow-up time than those with mild or moderate COVID-19. Interestingly, however,  
157 prevalence estimates appeared to increase slightly from month 11 after illness onset  
158 onwards in all cross-sectional estimates. This can most likely be explained by residual  
159 confounding of calendar time: those who were infected early on in the pandemic may have  
160 had reduced access to therapeutic interventions compared to those infected more recently.  
161 When stratifying by acute COVID-19 severity, this effect seemed most pronounced in those  
162 who had had mild or severe/critical disease, suggesting that clinical management for these  
163 groups has changed more over time than among those with moderate disease  
164 (Supplementary Figure S1). Finally, our symptom data was not complemented with  
165 qualitative data; a mixed-methods approach may have shed further light on which symptoms  
166 were directly associated with long COVID.

167 In conclusion, we have demonstrated the drastic variation in long COVID prevalence with  
168 symptom-based definitions. Standardisation of the selection of long COVID symptoms is  
169 therefore urgently needed. Harmonised data collection tools, as previously suggested [8],  
170 could be one means to achieve greater comparability of results. Nevertheless, the vast range  
171 of symptoms linked to the long COVID phenotype makes it difficult to balance  
172 comprehensiveness with reproducibility – posing the risk of over-simplification of a complex  
173 condition. Consensus from both patient and clinical societies, in combination with robust  
174 qualitative data, is crucial to ensure that long COVID is defined in a standardised but  
175 inclusive way.

176 Table 1. Socio-demographic, clinical and study characteristics of study participants of  
 177 the RECoVERED study, Amsterdam, the Netherlands, enrolled between May 2020  
 178 and June 2021 with at least one completed symptom survey, stratified by acute  
 179 COVID-19 severity

|                                                             | <b>Total</b>     | <b>Mild</b>      | <b>Moderate</b>  | <b>Severe/<br/>Critical</b> | <b>p-value</b> |
|-------------------------------------------------------------|------------------|------------------|------------------|-----------------------------|----------------|
|                                                             | <b>N=292</b>     | <b>N=86</b>      | <b>N=127</b>     | <b>N=79</b>                 |                |
| <b>Socio-demographic characteristics</b>                    |                  |                  |                  |                             |                |
| Sex                                                         |                  |                  |                  |                             | 0.25           |
| Male                                                        | 170 (58%)        | 44 (51%)         | 76 (60%)         | 50 (63%)                    |                |
| Female                                                      | 122 (42%)        | 42 (49%)         | 51 (40%)         | 29 (37%)                    |                |
| Age, years                                                  | 51.0 (36.0-62.0) | 41.0 (29.0-54.0) | 50.0 (34.0-62.0) | 60.0 (51.0-66.0)            | <0.001         |
| BMI, kg/m <sup>2</sup>                                      | 26.1 (23.3-29.4) | 24.4 (22.8-27.3) | 26.2 (23.5-29.4) | 27.4 (25.6-33.4)            | <0.001         |
| BMI category                                                |                  |                  |                  |                             | <0.001         |
| Normal weight                                               | 120 (41%)        | 50 (58%)         | 52 (41%)         | 18 (23%)                    |                |
| Overweight                                                  | 101 (35%)        | 23 (27%)         | 45 (35%)         | 33 (42%)                    |                |
| Obese                                                       | 67 (23%)         | 12 (14%)         | 30 (24%)         | 25 (32%)                    |                |
| Missing                                                     | 4 (1%)           | 1 (1%)           | 0 (0%)           | 3 (4%)                      |                |
| Country/region of birth                                     |                  |                  |                  |                             | 0.020          |
| Netherlands                                                 | 182 (62%)        | 60 (70%)         | 79 (62%)         | 43 (54%)                    |                |
| Morocco                                                     | 8 (3%)           | 3 (3%)           | 2 (2%)           | 3 (4%)                      |                |
| Asia, Middle East, Africa                                   | 29 (10%)         | 5 (6%)           | 14 (11%)         | 10 (13%)                    |                |
| South America, Caribbean (including Suriname and Curacao)   | 40 (14%)         | 4 (5%)           | 18 (14%)         | 18 (23%)                    |                |
| Other (Europe, Russia, Australia, Canada, USA, New Zealand) | 22 (8%)          | 10 (12%)         | 9 (7%)           | 3 (4%)                      |                |
| Missing                                                     | 11 (4%)          | 4 (5%)           | 5 (4%)           | 2 (3%)                      |                |
| Migration background                                        |                  |                  |                  |                             | 0.004          |
| Dutch                                                       | 181 (62%)        | 61 (71%)         | 76 (60%)         | 44 (56%)                    |                |
| Non-Dutch, OECD high-income                                 | 31 (11%)         | 11 (13%)         | 16 (13%)         | 4 (5%)                      |                |
| Non-Dutch, OECD low/middle income                           | 71 (24%)         | 10 (12%)         | 32 (25%)         | 29 (37%)                    |                |
| Missing                                                     | 9 (3%)           | 4 (5%)           | 3 (2%)           | 2 (3%)                      |                |
| Smoking                                                     |                  |                  |                  |                             | 0.12           |
| Non-smoker                                                  | 181 (62%)        | 52 (60%)         | 73 (57%)         | 56 (71%)                    |                |
| Smoker                                                      | 19 (7%)          | 8 (9%)           | 10 (8%)          | 1 (1%)                      |                |
| Ex-smoker                                                   | 87 (30%)         | 23 (27%)         | 43 (34%)         | 21 (27%)                    |                |
| Missing                                                     | 5 (2%)           | 3 (3%)           | 1 (1%)           | 1 (1%)                      |                |
| Highest level of education                                  |                  |                  |                  |                             | <0.001         |
| None, primary or secondary education                        | 41 (14%)         | 7 (8%)           | 22 (17%)         | 12 (15%)                    |                |
| Vocational training                                         | 70 (24%)         | 9 (10%)          | 32 (25%)         | 29 (37%)                    |                |
| University education                                        | 171 (59%)        | 66 (77%)         | 70 (55%)         | 35 (44%)                    |                |
| Missing                                                     | 10 (3%)          | 4 (5%)           | 3 (2%)           | 3 (4%)                      |                |
| Number of COVID-19 high-risk comorbidities                  |                  |                  |                  |                             | <0.001         |
| 0                                                           | 160 (55%)        | 61 (71%)         | 75 (59%)         | 24 (30%)                    |                |
| 1                                                           | 72 (25%)         | 18 (21%)         | 28 (22%)         | 26 (33%)                    |                |
| 2                                                           | 36 (12%)         | 5 (6%)           | 16 (13%)         | 15 (19%)                    |                |
| 3 or more                                                   | 24 (8%)          | 2 (2%)           | 8 (6%)           | 14 (18%)                    |                |
| Cardiovascular disease                                      | 78 (27%)         | 11 (13%)         | 31 (24%)         | 36 (46%)                    | <0.001         |
| Diabetes                                                    | 34 (12%)         | 5 (6%)           | 10 (8%)          | 19 (24%)                    | <0.001         |
| Chronic respiratory disease                                 | 19 (7%)          | 1 (1%)           | 8 (6%)           | 10 (13%)                    | 0.011          |
| Cancer                                                      | 16 (5%)          | 6 (7%)           | 6 (5%)           | 4 (5%)                      | 0.76           |
| Immunosuppressed                                            | 5 (2%)           | 0 (0%)           | 2 (2%)           | 3 (4%)                      | 0.17           |
| Psychiatric illness                                         | 18 (6%)          | 5 (6%)           | 9 (7%)           | 4 (5%)                      | 0.83           |



Selection of long COVID symptoms influences prevalence estimates

| Other comorbidities                                | 64 (22%)            | 11 (13%)            | 33 (26%)            | 20 (25%)                    | 0.054          |
|----------------------------------------------------|---------------------|---------------------|---------------------|-----------------------------|----------------|
|                                                    | <b>Total</b>        | <b>Mild</b>         | <b>Moderate</b>     | <b>Severe/<br/>Critical</b> | <b>p-value</b> |
|                                                    | <b>N=292</b>        | <b>N=86</b>         | <b>N=127</b>        | <b>N=79</b>                 |                |
| <b>Clinical characteristics</b>                    |                     |                     |                     |                             |                |
| Symptom status at baseline                         |                     |                     |                     |                             | 0.45           |
| Symptomatic                                        | 287 (98%)           | 85 (99%)            | 127 (100%)          | 75 (95%)                    |                |
| Asymptomatic                                       | 2 (1%)              | 1 (1%)              | 0 (0%)              | 0 (0%)                      |                |
| Missing                                            | 3 (1%)              | 0 (0%)              | 0 (0%)              | 4 (5%)                      |                |
| Hospital admission                                 | 141 (48%)           | 4 (5%)              | 60 (47%)            | 77 (97%)                    | <0.001         |
| ICU admission                                      | 40 (14%)            | NA                  | NA                  | 40 (51%)                    | <0.001         |
| Days from illness onset to COVID-19 diagnosis      | 4 (2-10)            | 3 (1-8)             | 4 (2-11)            | 7 (2-11)                    | 0.10           |
| Days from illness onset to hospitalisation         | 9 (7-14)            | 43 (9-85)           | 10 (8-16)           | 9 (7-12)                    | 0.10           |
| Days from illness onset to ICU admission           | 10 (7-12)           | NA                  | NA                  | 10 (7-12)                   |                |
| Received oxygen therapy before or during follow-up | 135 (46%)           | 0 (0%)              | 59 (46%)            | 76 (96%)                    | <0.001         |
| Maximal HR, beats/min                              | 82 (72-94)          | 75 (67-81)          | 84 (76-94)          | 94 (79-107)                 | <0.001         |
| Maximal RR, breaths/min                            | 20 (16-24)          | 16 (16-16)          | 20 (20-24)          | 24 (20-32)                  | <0.001         |
| Lowest SpO <sub>2</sub> , %                        | 96 (91-98)          | 98 (97-99)          | 96 (93-98)          | 88 (80-90)                  | <0.001         |
| Vaccinated during follow-up (primary series)       |                     |                     |                     |                             | 0.014          |
| Not vaccinated                                     | 40 (14%)            | 3 (3%)              | 23 (18%)            | 14 (18%)                    |                |
| Vaccinated                                         | 222 (76%)           | 71 (83%)            | 95 (75%)            | 56 (71%)                    |                |
| LTFU before vaccination                            | 30 (10%)            | 12 (14%)            | 9 (7%)              | 9 (11%)                     |                |
| Time from illness onset to first vaccination, days | 247 (144-364)       | 197 (129-302)       | 247 (162-318)       | 373 (137-393)               | 0.006          |
| Died during follow-up                              | 1 (0%)              | 0 (0%)              | 1 (1%)              | 0 (0%)                      | 1.00           |
| <b>Study characteristics</b>                       |                     |                     |                     |                             |                |
| Place of recruitment                               |                     |                     |                     |                             | <0.001         |
| Non-hospital                                       | 143 (49%)           | 75 (87%)            | 65 (51%)            | 3 (4%)                      |                |
| Hospital                                           | 149 (51%)           | 11 (13%)            | 62 (49%)            | 76 (96%)                    |                |
| Type of inclusion                                  |                     |                     |                     |                             | <0.001         |
| Prospective                                        | 209 (72%)           | 73 (85%)            | 99 (78%)            | 37 (47%)                    |                |
| Retrospective                                      | 83 (28%)            | 13 (15%)            | 28 (22%)            | 42 (53%)                    |                |
| Days from illness onset to inclusion in study      | 12 (6-51)           | 7 (4-12)            | 12 (6-32)           | 42 (14-89)                  | <0.001         |
| Prospective inclusions only                        | 9 (5-14)            | 6 (4-9)             | 9 (5-15)            | 14 (10-18)                  | <0.001         |
| Retrospective inclusions only                      | 86 (75-95)          | 93 (73-96)          | 85 (80-92)          | 88 (74-97)                  | 0.61           |
| Follow-up time from enrolment in study, days       | 562.0 (399.0-689.0) | 561.0 (412.0-658.0) | 587.0 (442.0-701.0) | 449.0 (274.0-698.0)         | 0.020          |
| Lost to follow-up                                  | 77                  | 24                  | 25                  | 28                          | NA             |

180

181 BMI=Body mass index; HIC= high-income country; HR=heart rate; LMIC= low- or middle income  
 182 country; LTFU= Loss to follow-up; ICU= Intensive Care Unit; NA = Not applicable; OECD=  
 183 Organisation for Economic Co-operation and Development; PASC= Post-acute sequelae of COVID-  
 184 19; RR=respiratory rate; SpO<sub>2</sub>= oxygen saturation.

185 Continuous variables presented as median (IQR) and compared using the Kruskal-Wallis test;  
 186 categorical and binary variables presented as n (%) and compared using the Pearson  $\chi^2$  test (or  
 187 Fisher exact test if n<5).

188 Acute COVID-19 severity groups defined as: mild as having a RR <20/min and SpO<sub>2</sub> on room air  
 189 >94% at both D0 and D7 study visits; moderate disease as having a RR 20-30/min, SpO<sub>2</sub> 90-94%  
 190 and/or receiving oxygen therapy at D0 or D7; severe disease as having a RR> 30/min or SpO<sub>2</sub> <90%  
 191 at D0 or D7; critical disease as requiring ICU admission.

## Selection of long COVID symptoms influences prevalence estimates

- 192 BMI categories defined as:  $<25 \text{ kg/m}^2$  normal or underweight;  $25\text{-}29 \text{ kg/m}^2$  overweight;  $\geq 30 \text{ kg/m}^2$   
193 obese.
- 194 Migration background was defined as Dutch and non-Dutch based on the country of birth of the  
195 participant and their parents; those of non-Dutch background were further classified as originating  
196 from a high-income (HIC) or low-/middle-income country (LMIC), according to the Organisation for  
197 Economic Co-operation and Development (OECD).
- 198 High-risk COVID-19 comorbidities are defined as listed by the WHO Clinical Management Guidelines  
199 and include: cardiovascular disease (including hypertension), chronic pulmonary disease (excluding  
200 asthma), renal disease, liver disease, cancer, immunosuppression (excluding HIV, including previous  
201 organ transplantation), previous psychiatric illness and dementia.

202 Figure 1. Proportions over time of RECoVERED cohort participants (Amsterdam, the  
 203 Netherlands) enrolled between 11 May 2020 and 21 June 2021 with long COVID,  
 204 according to four different definitions with changing selection of symptoms

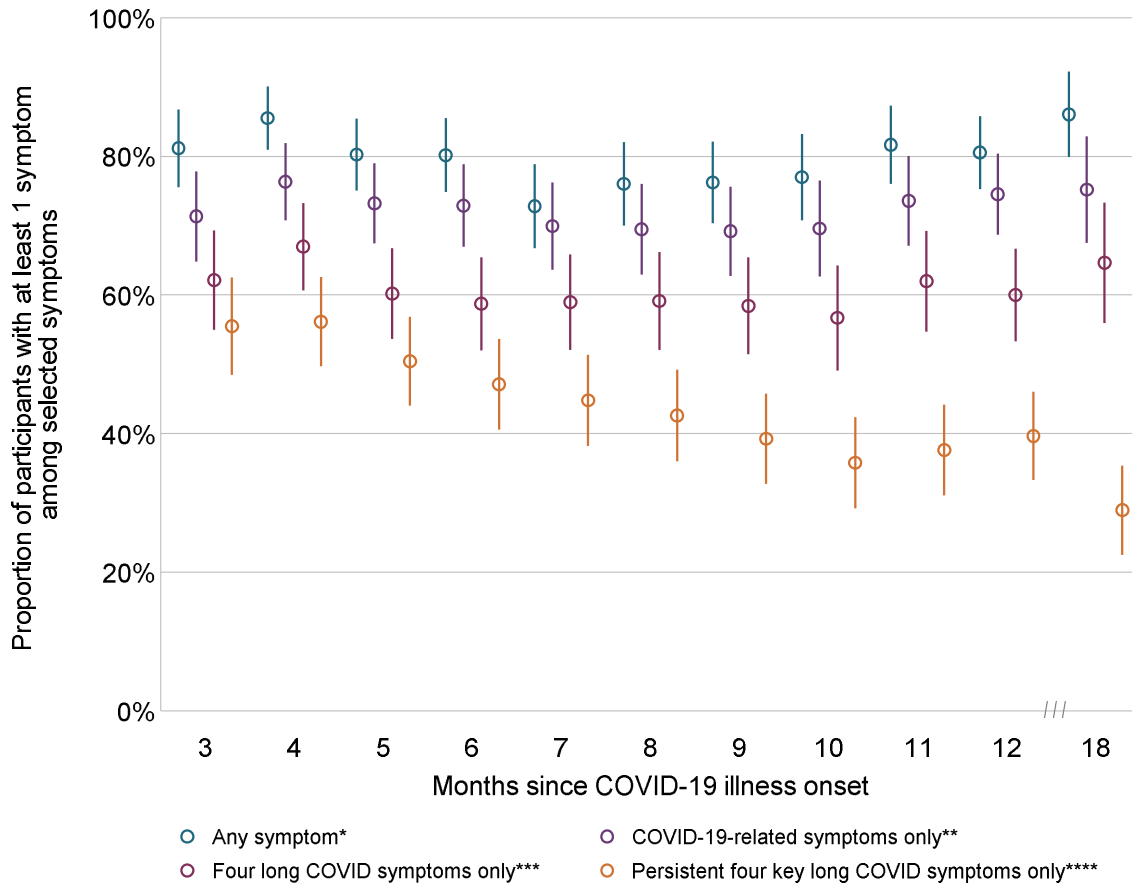

205

206 Data presented above are from month 3 onwards, in line with the common definitions of long COVID.  
 207 Subsequent selection of these symptoms was made according to the following criteria:

208 \* Any of the 20 symptoms included in the questionnaire

209 \*\* COVID-19 symptoms, including only those symptoms with a reported start date within the first  
 210 month of overall COVID-19 onset

211 \*\*\* Counting only the four most commonly-reported long COVID symptoms in our cohort: fatigue,  
 212 dyspnoea, loss of smell/taste and myalgia

213 \*\*\*\* Counting only the four most commonly-reported long COVID symptoms in our cohort if they had  
 214 persisted since illness onset (i.e., individuals with a later relapse in any of these four symptoms were  
 215 no longer included in the numerator)

216 **References:**

- 217 1. WHO. A clinical case definition of post COVID-19 condition by a Delphi consensus.  
218 World Health Organization (WHO) clinical case definition working group on post  
219 COVID-19 condition **2021**.
- 220 2. (NICE) NIfHCE. COVID-19 rapid guideline: managing the long-term effects of COVID-  
221 19 NG188 Vol. 2021: NICE, **2021**.
- 222 3. Blomberg B, Mohn KG-I, Brokstad KA, et al. Long COVID in a prospective cohort of  
223 home-isolated patients. *Nature Medicine* **2021**; 27(9): 1607-13.
- 224 4. Tran V-T, Porcher R, Pane I, Ravaud P. Course of post COVID-19 disease symptoms  
225 over time in the ComPaRe long COVID prospective e-cohort. *Nature*  
226 *Communications* **2022**; 13(1): 1812.
- 227 5. Wynberg E, van Willigen HDG, Dijkstra M, et al. Evolution of Coronavirus Disease  
228 2019 (COVID-19) Symptoms During the First 12 Months After Illness Onset. *Clinical*  
229 *Infectious Diseases* **2021**.
- 230 6. Dean N, Pagano M. Evaluating Confidence Interval Methods for Binomial Proportions  
231 in Clustered Surveys. *Journal of Survey Statistics and Methodology* **2015**; 3(4): 484-  
232 503.
- 233 7. Rubin R. As Their Numbers Grow, COVID-19 “Long Haulers” Stump Experts. *JAMA*  
234 **2020**; 324(14): 1381-3.
- 235 8. Sigfrid L, Cevik M, Jesudason E, et al. What is the recovery rate and risk of long-term  
236 consequences following a diagnosis of COVID-19? A harmonised, global longitudinal  
237 observational study protocol. *BMJ Open* **2021**; 11(3): e043887.

238 **Statements & Declarations**

239 **Acknowledgements:**

240 This research letter was prepared on behalf of the RECoVERED Study Group:

241 At the Public Health Service of Amsterdam: Ivette Agard, Jane Ayal, Floor Cavdar, Marianne  
242 Craanen, Udi Davinovich, Annemarieke Deuring, Annelies van Dijk, Ertan Ersan, Laura del  
243 Grande, Joost Hartman, Nelleke Koedoot, Romy Lebbink, Dominique Loomans, Agata  
244 Makowska, Tom du Maine, Ilja de Man, Amy Matser, Lizenka van der Meij, Maria Oud,  
245 Marleen van Polanen, Clark Reid, Leeann Storey, Marc van Wijk.

246 At the Amsterdam University Medical Centres: Joost van den Aardweg, Joyce van Assem,  
247 Marijne van Beek, Thyra Blankert, Maartje Dijkstra, Orlane Figaroa, Leah Frenkel, Marit van  
248 Gils, Jelle van Haga, Xiaochuan (Alvin) Han, Agnes Harskamp-Holwerda, Mette Hazenberg,  
249 Soemeja Hidad, Anja Lok, Nina de Jong, Hans Knoop, Neeltje Kootstra, Lara Kuijt, Eric Moll-  
250 van Charante, Pythia Nieuwkerk, Colin Russell, Karlijn van der Straten, Annelou van der  
251 Veen, Bas Verkaik, Gerben-Rienk Visser.

252 **Funding:**

253 This publication is part of the project RECoVERED with project number 10150062010002 of  
254 the research programme Infectieziektebestrijding 3 2019-2023, which is financed by the  
255 Netherlands Organisation for Health Research and Development (ZonMw) and awarded to  
256 M.D. de Jong. This work was additionally supported by the Public Health Service of  
257 Amsterdam (Research & Development grant numbers 21-14 and 22-09), awarded to M.  
258 Prins.

259 **Author contributions:**

260 Conceptualisation: Maria Prins, Anders Boyd, Tjalling Leenstra, Godelieve de Bree, Elke  
261 Wynberg. Data collection: Anouk Verveen, Hugo van Willigen, Elke Wynberg. Formal  
262 analysis and investigation: Anders Boyd, Elke Wynberg. Writing – original draft: Maria Prins,  
263 Anders Boyd, Elke Wynberg. Writing – review and editing: All authors. Funding acquisition:

Selection of long COVID symptoms influences prevalence estimates

264 Maria Prins, Godelieve de Bree, Menno de Jong. Supervision and project management:

265 Maria Prins, Godelieve de Bree, Menno de Jong, Tjalling Leenstra.

266 **Potential Conflicts of Interest:**

267 The authors declare no conflicts of interests in terms of relationships or activities. The

268 funding source had no influence on study design. All authors had access to the study data.

269 **Ethical Approval and Patient Consent Statement:**

270 RECoVERED is an observation study that was approved by the medical ethical review board

271 of the Amsterdam University Medical Centres (NL73759.018.20). All participants of the

272 RECoVERED study provided written informed consent.

Proportion of participants with at least 1 symptom among selected symptoms

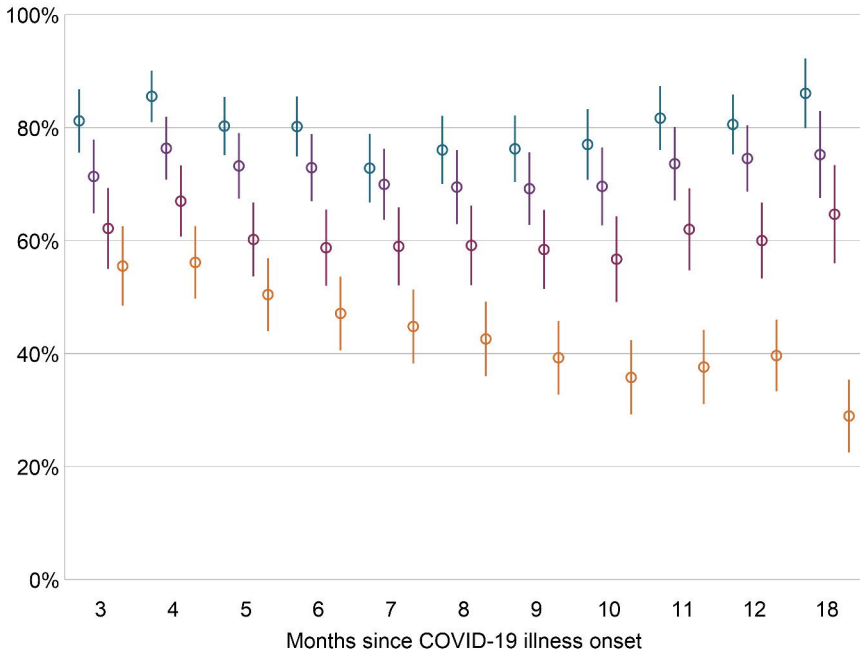

○ Any symptom\*

○ COVID-19-related symptoms only\*\*

○ Four long COVID symptoms only\*\*\*

○ Persistent four key long COVID symptoms only\*\*\*\*
